# Supplementary material
Source: HighWire-hosted journal article supplement (https://bmjopen.bmj.com/content/6/4/e010453)
Supplement: inline-supplementary-material-1 [file inline-supplementary-material-1.pdf]

## Appendix 1. Coding Tree

| Themes                                             | Sub themes                                                                                                             |
|----------------------------------------------------|------------------------------------------------------------------------------------------------------------------------|
| Making sense of fatigue and sleep after TBI        | Feeling unprepared<br>Persistent and enduring nature confusing<br>Understanding triggers<br>Early advice is helpful    |
| Accepting the need for rest                        | Reaching a crisis point<br>Needing permission to rest<br>Needing others to monitor and prompt<br>Continuous monitoring |
| Learning how to rest                               | Knowing how to rest<br>Are naps a good or bad thing?<br>Knowing how and when to push self<br>Allowing self to recover  |
| Need for rest impacts on ability to engage in life | Re-evaluating priorities<br>Restriction in participation<br>Managing unexpected events                                 |
